# Supplementary material
Source: Research Square preprint supplement (doi:10.21203/rs.3.rs-9866691/v1)
Supplement: Supplementary file 1 [file 15bbf1631727e2011c9af455.docx]

Supplementary Information
Can Low-altitude Logistics Drive County-level Green Transformation? Synthetic Control Evidence from Nankang District, China
Table S1. Annual observed and synthetic CEGT paths for Nankang District, 2007–2022.
Year	Observed CEGT	Synthetic CEGT	Gap
2007	0.470005	0.473130	-0.003124
2008	0.483942	0.481131	+0.002811
2009	0.487262	0.482671	+0.004591
2010	0.492896	0.484141	+0.008755
2011	0.479478	0.475945	+0.003533
2012	0.488722	0.483621	+0.005100
2013	0.468471	0.459061	+0.009410
2014	0.472027	0.463743	+0.008284
2015	0.492493	0.484717	+0.007776
2016	0.502352	0.488972	+0.013380
2017	0.503793	0.496607	+0.007187
2018	0.529946	0.518500	+0.011446
2019	0.561272	0.525746	+0.035526
2020	0.582936	0.544613	+0.038323
2021	0.601578	0.547469	+0.054109
2022	0.602648	0.558919	+0.043729

Notes: Gap = Observed CEGT − Synthetic CEGT. Pre-treatment period 2007–2016; post-treatment period 2017–2022.
Table S2. Permutation inference results.
Panel A. Full permutation distribution (all 80 units).
Rank	Unit ID	County name	Pre-treatment RMSPE	Post-treatment RMSPE	Post/Pre RMSPE ratio
1	1	Nankang District	0.007420	0.035948	4.844847
2	4	Anyi County	0.005571	0.021865	3.925151
3	53	Shanggao County	0.010331	0.033975	3.288506
4	28	Chongyi County	0.003919	0.011947	3.048384
5	52	Wanzai County	0.006657	0.019559	2.937920
6	48	Anfu County	0.004771	0.013720	2.875564
7	39	Longnan City	0.013572	0.031998	2.357568
8	49	Yongxin County	0.006683	0.015454	2.312655
9	26	Dayu County	0.009569	0.021619	2.259374
10	79	Wuyuan County	0.014131	0.031539	2.231971
11	55	Jing'an County	0.006423	0.013623	2.120912
12	64	Chongren County	0.009887	0.020119	2.034971
13	40	Ji'an County	0.023850	0.047540	1.993264
14	24	Gan County	0.012104	0.023972	1.980553
15	69	Guangchang County	0.008036	0.014837	1.846251
16	74	Hengfeng County	0.006854	0.012434	1.814094
17	16	Duchang County	0.015084	0.027115	1.797574
18	10	Luxi County	0.012122	0.020993	1.731829
19	37	Shicheng County	0.028108	0.048298	1.718288
20	47	Wan'an County	0.020418	0.034868	1.707724
21	51	Fengxin County	0.006633	0.011277	1.700149
22	54	Yifeng County	0.023262	0.038843	1.669826
23	34	Xingguo County	0.007835	0.011860	1.513775
24	5	Jinxian County	0.017291	0.025369	1.467214
25	77	Poyang County	0.024340	0.035011	1.438366
26	21	Fenyi County	0.041007	0.058865	1.435491
27	17	Hukou County	0.107920	0.154552	1.432101
28	18	Pengze County	0.041932	0.059566	1.420531
29	56	Tonggu County	0.030546	0.041452	1.357032
30	78	Wannian County	0.018763	0.024871	1.325518
31	13	Xiushui County	0.031735	0.041314	1.301848
32	6	Fuliang County	0.056543	0.073411	1.298312
33	63	Nanfeng County	0.027234	0.034975	1.284240
34	50	Jinggangshan City	0.054870	0.069374	1.264327
35	25	Xinfeng County	0.053797	0.067334	1.251635
36	32	Ningdu County	0.008353	0.010096	1.208657
37	70	Guangfeng District	0.044107	0.053297	1.208365
38	66	Yihuang County	0.006548	0.007825	1.195031
39	71	Guangxin District	0.025310	0.030015	1.185871
40	76	Yugan County	0.006385	0.007420	1.162046
41	44	Yongfeng County	0.009838	0.010897	1.107732
42	58	Zhangshu City	0.021669	0.023476	1.083421
43	29	Anyuan County	0.008351	0.009014	1.079373
44	12	Wuning County	0.009111	0.009770	1.072294
45	75	Yiyang County	0.013787	0.014505	1.052084
46	11	Chaisang District	0.030884	0.032320	1.046519
47	19	Ruichang City	0.042948	0.044917	1.045841
48	65	Le'an County	0.047423	0.047840	1.008797
49	30	Dingnan County	0.021510	0.021608	1.004556
50	43	Xingan County	0.036934	0.037058	1.003359
51	45	Taihe County	0.026537	0.026599	1.002329
52	68	Zixi County	0.014855	0.014353	0.966229
53	61	Nancheng County	0.018600	0.017826	0.958343
54	41	Jishui County	0.026106	0.024141	0.924744
55	72	Yushan County	0.034451	0.031381	0.910873
56	67	Jinxi County	0.013439	0.012079	0.898786
57	36	Xunwu County	0.014314	0.012841	0.897116
58	60	Dongxiang District	0.008476	0.007466	0.880887
59	20	Lushan City	0.032529	0.027629	0.849358
60	7	Leping City	0.049467	0.040425	0.817194
61	42	Xiajiang County	0.018289	0.014695	0.803504
62	80	Dexing City	0.030766	0.023919	0.777468
63	33	Yudu County	0.036244	0.028043	0.773731
64	9	Shangli County	0.050482	0.038593	0.764498
65	3	Nanchang County	0.046940	0.035827	0.763251
66	15	De'an County	0.020320	0.015052	0.740764
67	59	Gao'an City	0.023788	0.017608	0.740177
68	8	Lianhua County	0.021910	0.015846	0.723210
69	23	Guixi City	0.019289	0.013644	0.707342
70	57	Fengcheng City	0.020729	0.014283	0.689016
71	46	Suichuan County	0.029006	0.019947	0.687682
72	2	Xinjian District	0.033277	0.021647	0.650513
73	31	Quannan County	0.011101	0.007127	0.641972
74	27	Shangyou County	0.008842	0.005366	0.606860
75	73	Qianshan County	0.032450	0.018315	0.564398
76	62	Lichuan County	0.014353	0.007686	0.535520
77	35	Huichang County	0.007290	0.003654	0.501274
78	38	Ruijin City	0.019735	0.007382	0.374031
79	22	Yujiang District	0.044995	0.016591	0.368719
80	14	Yongxiu County	0.024463	0.008902	0.363883

Notes: Unit 1 is the treated unit (Nankang District). The full exact permutation p-value is (0+1)/(79+1) = 0.0125.
Panel B. Sensitivity to alternative pre-treatment fit restrictions.
Pre-treatment fit restriction	Threshold	Placebos retained	Placebos with ratio ≥ Nankang	Rank	Exact p-value
Pre-RMSPE ≤ 1.5 × Nankang Pre-RMSPE	0.01112969	23/79	0	1/24	0.04167
Pre-RMSPE ≤ 2.0 × Nankang Pre-RMSPE	0.01483958	31/79	0	1/32	0.03125
Pre-RMSPE ≤ 3.0 × Nankang Pre-RMSPE	0.02225937	45/79	0	1/46	0.02174

Notes: All restricted-inference calculations are based on the existing placebo results and exclude placebo units with inadequate pre-treatment fit under alternative RMSPE thresholds; no re-estimation of the baseline treatment effect is involved.
Table S3. Leave-one-out robustness results.
Removed donor	Original donor weight	Post-treatment average gap	Change relative to baseline
Baseline (all donors)	–	+0.03172003	–
Fengcheng City	0.559320 (55.93%)	+0.03392698	+7.0%
Shicheng County	0.154954 (15.50%)	+0.02969280	–6.4%
Wannian County	0.142909 (14.29%)	+0.03328636	+4.9%
Shanggao County	0.138892 (13.89%)	+0.02942616	–7.2%
Yudu County	0.003925 (0.39%)	+0.03179796	+0.2%

Notes: Each row reports re-estimation excluding one positive-weight donor. The post-treatment average gap remains positive in all cases, with relative changes within ±7.2%.
Table S4. In-time placebo test using 2014 as the pseudo-policy year.
Statistic	Value
Pseudo-policy year	2014
Pseudo-pre period	2007–2013
Pseudo-post period	2014–2016
Pseudo-pre RMSPE	0.02612581
Pseudo-post RMSPE	0.01656206
RMSPE ratio	0.633935
Average pseudo-post gap	–0.01542936

Notes: The in-time placebo assigns a pseudo-policy date before the actual 2017 pilot and evaluates only pre-treatment years. The negative pseudo-post gap indicates that no comparable positive divergence emerges before actual policy implementation. This exercise is interpreted as supplementary falsification evidence rather than a definitive test eliminating all pre-treatment dynamic concerns.
Figure S1. Annual CEGT gaps between observed and synthetic Nankang, 2007–2022.

Notes: Annual gap = Observed CEGT − Synthetic CEGT. Light bars denote pre-policy years (2007–2016); dark bars denote post-policy years (2017–2022). The dotted vertical line marks 2017.
